# Supplementary material for: Zr-based-MOF composite electrode design enabling uniform and dense lithium deposition through tuned conductivity
Source: Royal Society of Chemistry journal article supplement (doi:10.1039/d5ta06522d), 2025-01-01
Supplement: d5ta06522d1.pdf [file d5ta06522d1.pdf]

## Supporting information

### **Zr-Based-MOF Composite Electrode Design Enabling Uniform and Dense Lithium Deposition through Tuned Conductivity**

Yeon Woo Nahm<sup>‡a</sup>, Jae Hun Choi<sup>‡a</sup>, Jung-Kul Lee<sup>\*b</sup>, and Yun Chan Kang<sup>\*a</sup>

<sup>a</sup>Department of Materials Science and Engineering, Korea University, Anam-Dong, Seongbuk-Gu, Seoul 136-713, Republic of Korea.

<sup>b</sup>Department of Chemical Engineering, Konkuk University, Hwayang-dong, Gwangjingu, Seoul 143-701, Republic of Korea.

[<sup>‡</sup>] These two authors contributed equally to this work.

\*Corresponding authors.

E-mail addresses: jkrhee@konkuk.ac.kr (J.-K. Lee), yckang@korea.ac.kr (Y.C. Kang)

## Experimental Section

### Material characterization

The morphologies of the samples were examined via scanning electron microscopy (SEM, TESCAN, VEGA3). For a more detailed analysis of the microstructure, transmission electron microscopy TEM (JEOL, JM-2100F) was performed at the Korea Basic Science Institute (KBSI), Daegu Center. The crystallographic structure of the synthesized materials was analyzed using X-ray diffraction (XRD, X's pert Pro MPD) at KBSI Daegu center, employing Cu-K radiation ( $\lambda = 1.54 \text{ \AA}$ ). Thermogravimetric analysis (TGA, Pyris 1, PerkinElmer) was conducted for carbonized derivative of MOF-808 (C-MOF-808) under air from 0 to 800 °C. X-ray photoelectron spectroscopy (XPS, K-alpha, Thermo U.K), with a monochromatic Al  $K_{\alpha}$  X-ray source, was utilized at Yonsei center for Research Facilities (YCRF) to investigate surface chemical states. Raman spectroscopy (LabRAM HR Evolution Visible\_NIR, HORIBA) with a 633 nm He-Ne laser was used to analyze the vibrational modes of the samples at the KAIST Analysis Center for Research Advancement (KARA). The specific surface area and pore size distribution were determined from N<sub>2</sub> adsorption-desorption isotherms using the Brunauer–Emmett–Teller (BET, ASAP2460, Micromeritics) method. Finally, the electrical conductivity of the electrodes was measured using a four-point probe (AiT, CMT-SR2000N) in the range of 5  $\mu\text{S cm}^{-1}$  to 100  $\text{kS cm}^{-1}$ .

### Electrochemical measurement

All CR2032 type coin cells were assembled in an Ar-filled glove box. Electrochemical measurements were performed using a battery analyzer (WonATech, WBCS-3000s cycler). To prepare the lithium metal host electrodes, a slurry was formed by mixing sample powders of MOF-808 and C-MOF-808 in particular ratios with polyvinylidene fluoride (PVDF) in a mass ratio of 9:1, using N-methyl-2-pyrrolidone (NMP) as the solvent. The slurry was then uniformly coated onto Cu foil using a doctor blade, followed by drying overnight at 50 °C. Circular electrodes with a diameter of 1.4 cm were punched, with the active material loading controlled in the range of 1.3-1.6  $\text{mg cm}^{-2}$ . The electrolyte used in both asymmetrical and symmetrical cell tests consisted of 1.0 M lithium bis (trifluoromethane) sulfonamide (LiTFSI) dissolved in a 1:1 (v/v) mixture of 1,2-dimethoxyethane (DME) and 1,3-dioxolane (DOL), supplemented with 0.3 M LiNO<sub>3</sub>. For SEI stabilization and removal of surface contaminants, two initial cycles were conducted at 1.0  $\text{mA cm}^{-2}$  within a potential range of 0.0-1.0 V at 1.0  $\text{mA cm}^{-2}$  prior to the asymmetric cell tests. For symmetric and full cell tests, 5.0  $\text{mAh cm}^{-2}$  amount of lithium was pre-deposited onto the electrodes at a current density of 2.0  $\text{mA cm}^{-2}$ . For full-cell assembly,

LiFePO<sub>4</sub> (LFP) cathodes were prepared by blending LFP powder, PVDF, and Super-P conductive agent at a weight ratio of 90:5:5 and dispersing them in NMP. The slurry was coated onto Al foil, dried at 60 °C, and punched into a circle with a diameter of 1.4 cm. The electrolyte for the full cells consisted of 1 M LiPF<sub>6</sub> dissolved in a mixture of ethylene carbonate (EC), dimethyl carbonate (DMC), and ethyl methyl carbonate (EMC) in a 1:2:1 (v/v/v) ratio. Additional full cell cycling tests were conducted using ether-based electrolytes identical to those employed in the asymmetrical and symmetrical cell experiments. The LFP cathode loading was maintained between 5.8 – 6.5 mg cm<sup>-2</sup>, and the N/P ratio of the full cells were calculated to range from 4.5 to 5.0, based on the theoretical capacity of LFP (1.0 C = 170.0 mAh g<sup>-1</sup>). For full cells utilizing ether-based electrolytes, N/P ratio was adjusted to approximately 4.1. The full cells were cycled between 2.5 and 3.7 V at various current densities.

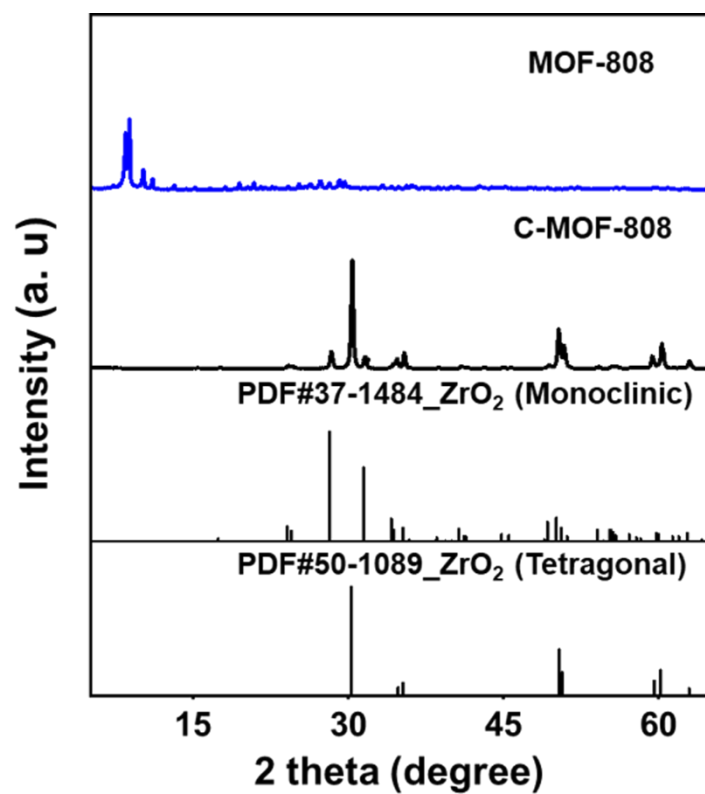

**Fig. S1.** XRD patterns of MOF-808 and C-MOF-808 powders.

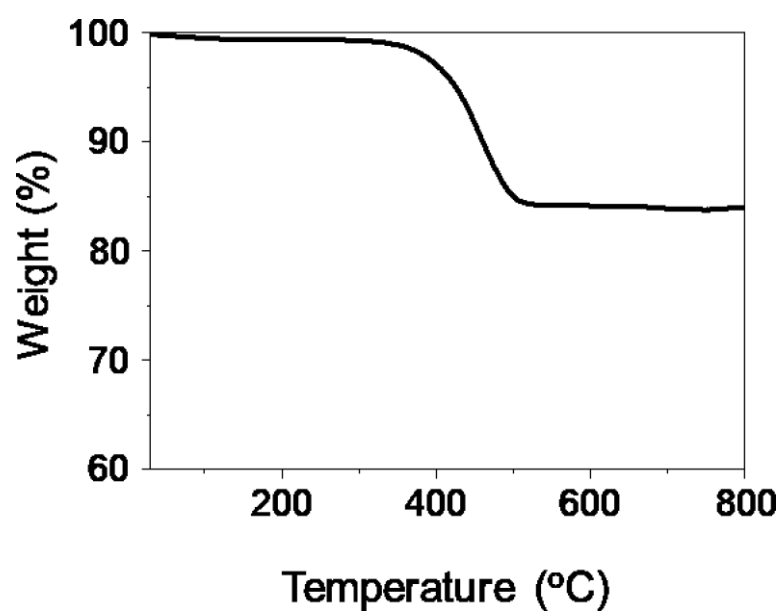

**Fig. S2.** TGA curve of C-MOF-808 under air atmosphere.

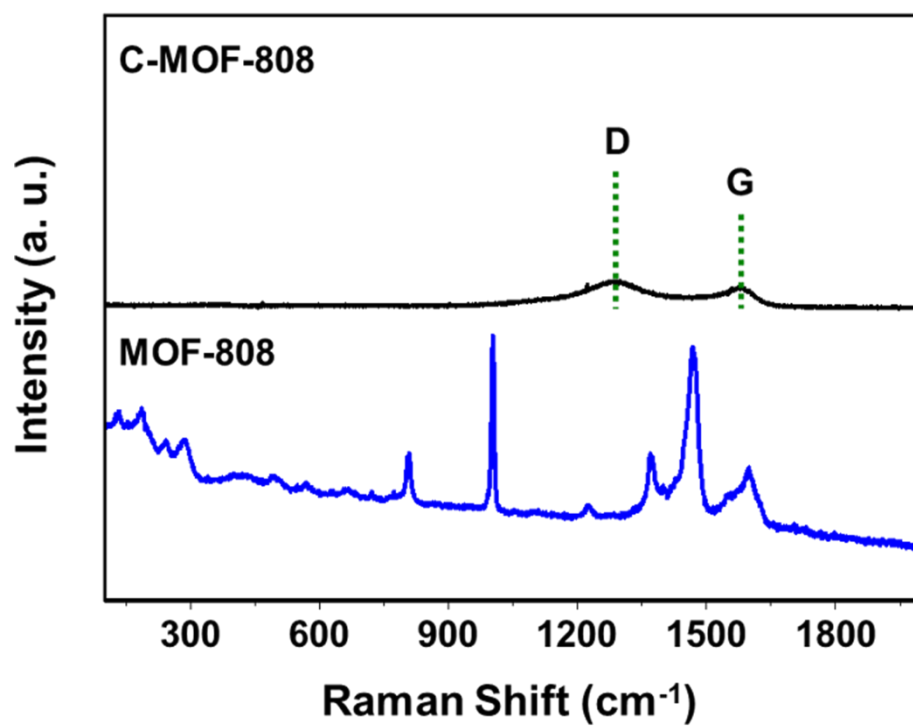

**Fig. S3.** Raman spectra of MOF-808 and C-MOF-808 powders.

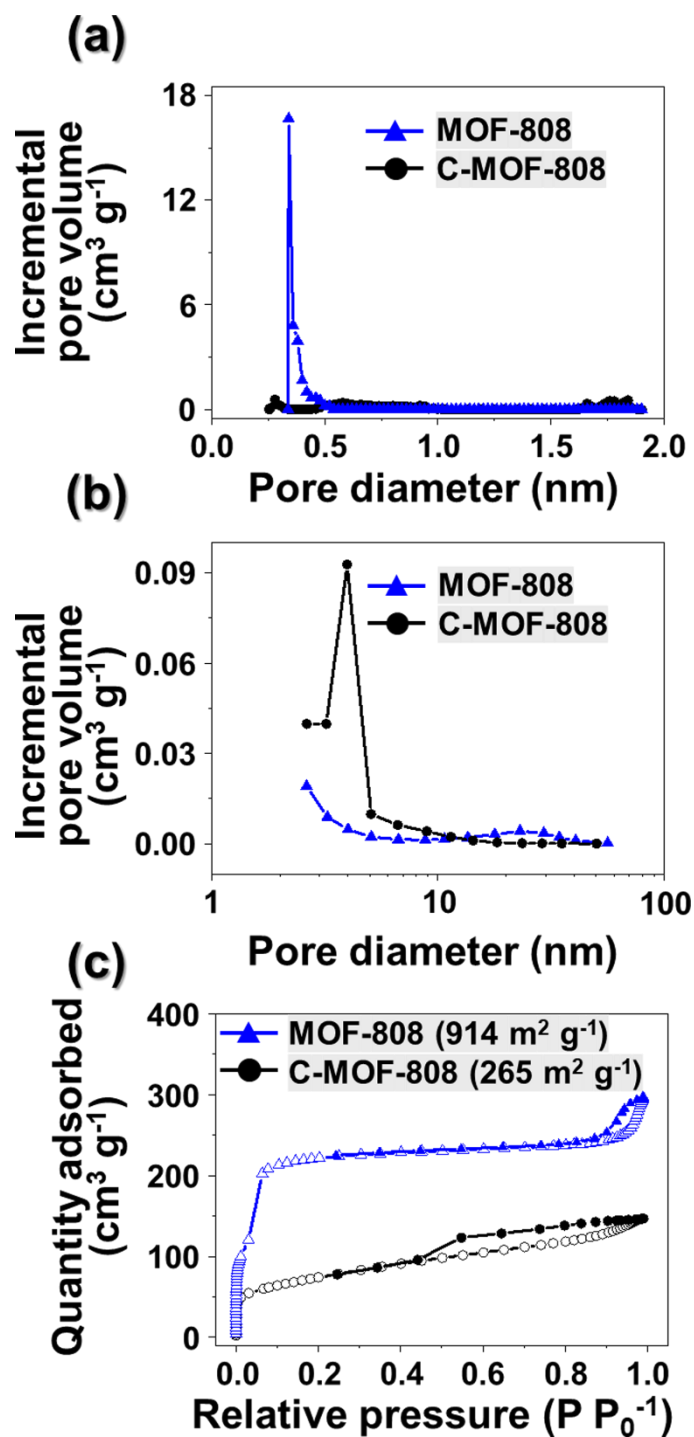

**Fig. S4.** Micropore and mesopore size distribution and specific surface area analysis of MOF-808 and C-MOF-808 using (a) the MP method, (b) the BJH method, and (c) N<sub>2</sub> adsorption-desorption isotherms, respectively.

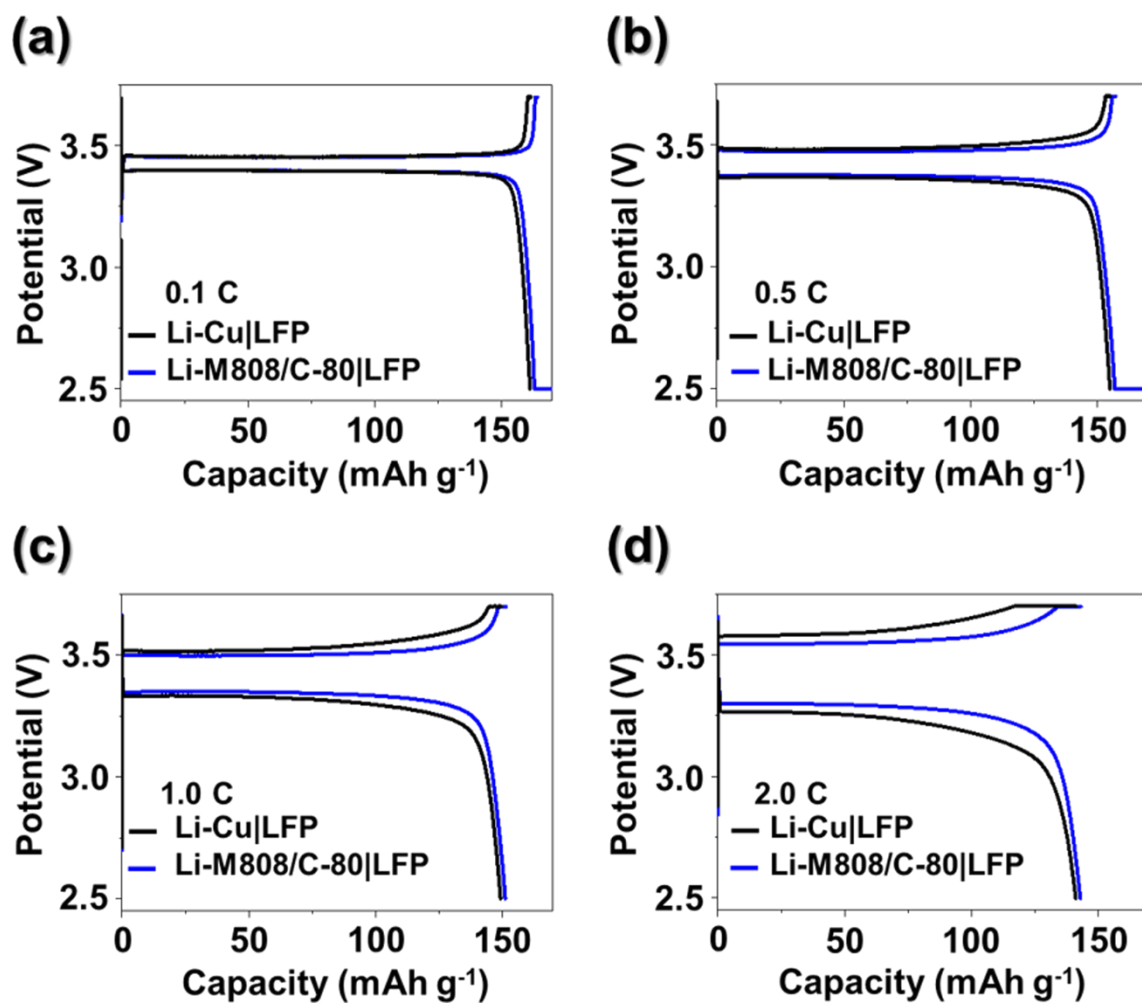

**Fig. S5.** Voltage profiles of Li-Cu|LFP and Li-M808/C-80|LFP full cells at current densities of (a) 0.1, (b) 0.5, (c) 1.0, and (d) 2.0 C.



**Table S1.** Performance comparison of asymmetric cell tests.

| Samples           | Asymmetric Test Capacity | Asymmetric Test Current Density | Asymmetric Test Cycle | Asymmetric Test Coulombic Efficiency | Ref       |
|-------------------|--------------------------|---------------------------------|-----------------------|--------------------------------------|-----------|
| M808/C-80         | 1.0 mAh cm <sup>-2</sup> | 2.0 mA cm <sup>-2</sup>         | 150 cycles            | 97.0 %                               | This work |
| SiC/CC            | 1.0 mAh cm <sup>-2</sup> | 2.0 mA cm <sup>-2</sup>         | 100 cycles            | 90.0 %                               | [S1]      |
| Cu-Au-ZnO-PAN-ZnO | 1.0 mAh cm <sup>-2</sup> | 0.5 mA cm <sup>-2</sup>         | 120 cycles            | 99.0 %                               | [S2]      |
| NHCF/CN/ZnO       | 1.0 mAh cm <sup>-2</sup> | 2.0 mA cm <sup>-2</sup>         | 100 cycles            | 97.5 %                               | [S3]      |
| Li  CuBIB-Gly/Cu  | 1.0 mAh cm <sup>-2</sup> | 1.0 mA cm <sup>-2</sup>         | 100 cycles            | 84.7 %                               | [S4]      |
| COF-LZU1          | 2.0 mAh cm <sup>-2</sup> | 1.0 mA cm <sup>-2</sup>         | 100 cycles            | 84.7 %                               | [S5]      |

**Table S2.** Electrical conductivities of electrodes with different ratios of MOF-808 and C-MOF-808.

|                                                  | MOF-808                   | M808/C-50 | M808/C-80 | C-MOF-808 |
|--------------------------------------------------|---------------------------|-----------|-----------|-----------|
| Electrical conductivity<br>(S cm <sup>-1</sup> ) | Out of range<br>(Too low) | 1.3       | 8.3       | 20.2      |

**Table S3.** Performance comparison of symmetric cell tests.

| Samples                            | Cycling Capacity               | Cycle Life    | Voltage Hysteresis | Ref              |
|------------------------------------|--------------------------------|---------------|--------------------|------------------|
| <b>M808/C-80</b>                   | <b>1.0 mAh cm<sup>-2</sup></b> | <b>1250 h</b> | <b>18.5 mV</b>     | <b>This work</b> |
| SiC/CC                             | 1.0 mAh cm <sup>-2</sup>       | 1000 h        | 28.0 mV            | [S1]             |
| Co <sub>3</sub> O <sub>4</sub> -NF | 1.0 mAh cm <sup>-2</sup>       | 1000 h        | 30.0 mV            | [S6]             |
| ICDL                               | 1.0 mAh cm <sup>-2</sup>       | 1100 h        | 22.0 mV            | [S7]             |
| MOF-HCF                            | 1.0 mAh cm <sup>-2</sup>       | 1000 h        | 20.0 mV            | [S8]             |
| m-MOF/PP                           | 1.0 mAh cm <sup>-2</sup>       | 700 h         | 40.0 mV            | [S9]             |
| CuO NAs/CF                         | 1.0 mAh cm <sup>-2</sup>       | 500 h         | 40.0 mV            | [S10]            |
| ZnO/Carbon                         | 1.0 mAh cm <sup>-2</sup>       | 388 h         | 28.0 mV            | [S11]            |

- S1. B. Sun, Q. Zhang, W. Xu, R. Zhao, H. Zhu, W. Lv, X. Li and N. Yang, *Nano Energy*, 2022, **94**, 106937.
- S2. H. Zheng, Q. Zhang, Q. Chen, W. Xu, Q. Xie, Y. Cai, Y. Ma, Z. Qiao, Q. Luo and J. Lin, *J. Mater. Chem. A*, 2020, **8**, 313-322.
- S3. X.-L. Zhang, Z.-Q. Ruan, Q.-T. He, X.-J. Hong, X. Song, Q.-F. Zheng, J.-H. Nie, Y.-P. Cai and H. Wang, *ACS Appl. Mater. Interfaces*, 2021, **13**, 3078-3088.
- S4. K. Zeng, M. Wang, D. Yang, Y. Wang, T. Hu, Y. Zheng, Z. Li and M. Liu, *Chem. Eng. J.*, 2025, **503**, 158396.
- S5. Y. Xu, Y. Zhou, T. Li, S. Jiang, X. Qian, Q. Yue and Y. Kang, *Energy Storage Mater.*, 2020, **25**, 334-341.
- S6. T. Wei, J. Lu, P. Zhang, G. Yang, C. Sun, Y. Zhou, Q. Zhuang and Y. Tang, *Chin. Chem. Lett.*, 2023, **34**, 107947.

- S7. J. Man, W. Liu, H. Zhang, K. Liu, Y. Cui, J. Yin, X. Wang and J. Sun, *J. Mater. Chem. A*, 2021, **9**, 13661-13669.
- S8. Z.-J. Zheng, Q. Su, Q. Zhang, X.-C. Hu, Y.-X. Yin, R. Wen, H. Ye, Z.-B. Wang and Y.-G. Guo, *Nano Energy*, 2019, **64**, 103910.
- S9. C. Kim, W. Jeong, H. R. Shin, K.-N. Jung and J.-W. Lee, *J. Mater. Chem. A*, 2024, **12**, 10686-10694.
- S10. L. Wei, L. Li, T. Zhao, N. Zhang, Y. Zhao, F. Wu and R. Chen, *Nanoscale*, 2020, **12**, 9416-9422.
- S11. L. Wang, X. Zhu, Y. Guan, J. Zhang, F. Ai, W. Zhang, Y. Xiang, S. Vijayan, G. Li and Y. Huang, *Energy Storage Mater.*, 2018, **11**, 191-196.
